# Supplementary material for: On the origin of the oxidizing ability of ceria nanoparticles
Source: Royal Society of Chemistry journal article supplement (doi:10.1039/c5ra20700b), 2015-01-01
Supplement: c5ra20700b1.pdf [file c5ra20700b1.pdf]

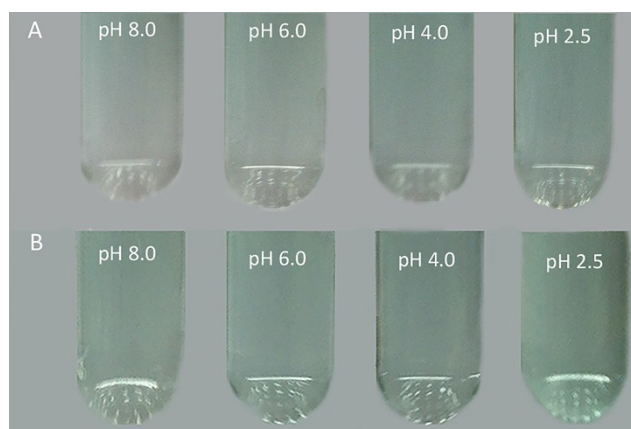

**Fig. S1** Effects of pH values on the oxidation of ABTS (2 mM): A) ABTS alone; B) H<sub>2</sub>O<sub>2</sub> (500 μM). The photos were taken on the 3rd minute after the addition of ABTS.

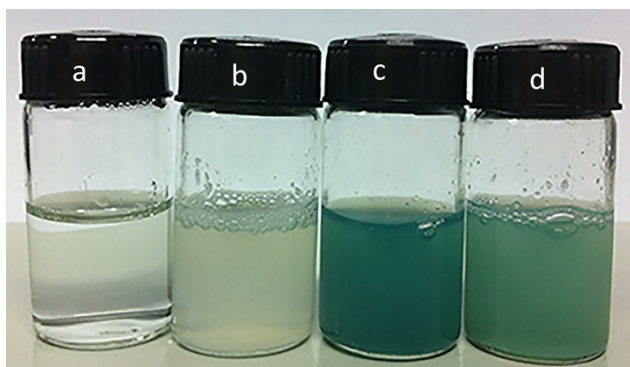

**Fig. S2** Effect of catalase (CAT) on the oxidative activity of nanoceria: a) ABTS; b) CAT and ABTS; c) nanoceria and ABTS; d) pretreated nanoceria by CAT and ABTS. The photo was taken within 3 min after ABTS was added.

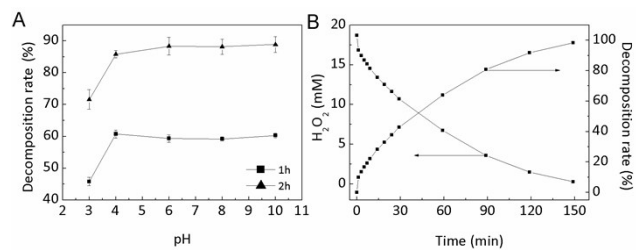

**Fig. S3** The decomposition rate of H<sub>2</sub>O<sub>2</sub> as a function of pH (A) and time (B) with H<sub>2</sub>O<sub>2</sub> (19.0 mM) and nanoceria (1g L<sup>-1</sup>) at 25±0.5°C and 200rpm.

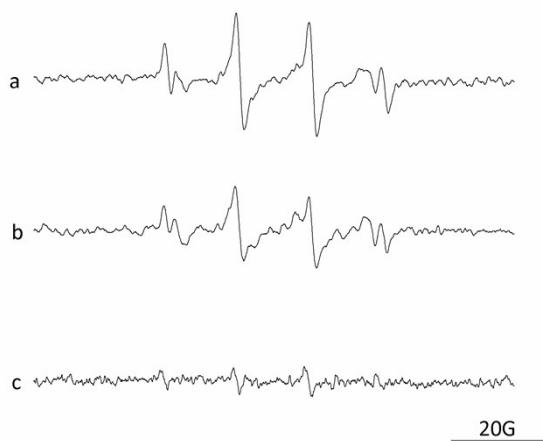

**Fig. S4** EPR spectra: nanoceria ( $1\text{g L}^{-1}$ ) with  $\text{H}_2\text{O}_2$  (20 mM) at pH=3.0 (a) and pH=10.0 (b); c)  $\text{H}_2\text{O}_2$  (20 mM), pH=3.0.

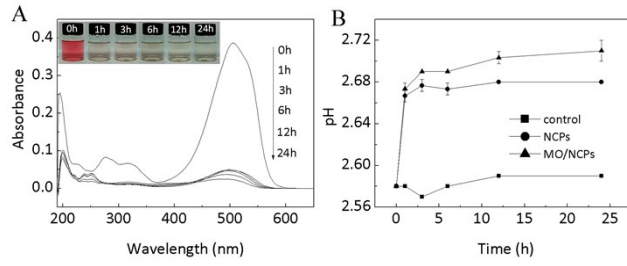

**Fig. S5** A) UV-vis spectra of MO as a function of reaction time in the nanoceria (NCPs) suspension; B) pH values as a function of time, the control group was water at pH 2.58.

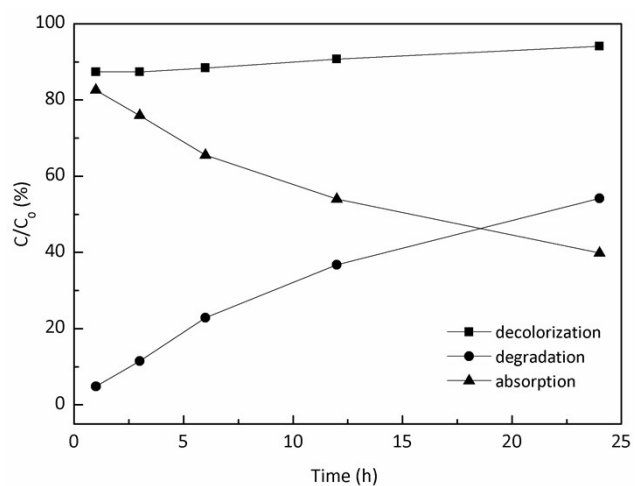

**Fig. S6** Data analysis on the oxidation of MO catalysed by nanoceria: nanoceria ( $1\text{g L}^{-1}$ ), MO ( $3.5\text{ mg L}^{-1}$ ) with initial pH 2.58,  $30\pm 0.5^\circ\text{C}$  and 200rpm.

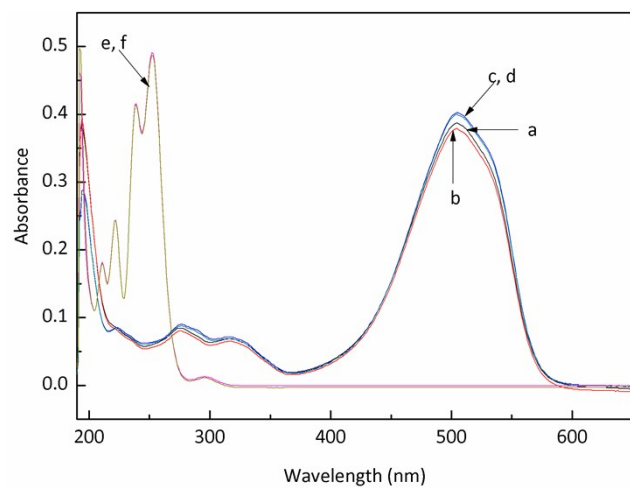

**Fig. S7** The UV-vis spectra: supernatant (contained  $18.9 \mu\text{M}$  dissolved Ce) of ceria/MO system with MO ( $3.5 \text{ mg L}^{-1}$ ) at the initial time point (a), and at 6 h (b);  $\text{CeCl}_3$  ( $18.9 \mu\text{M}$ ) / MO ( $3.5 \text{ mg L}^{-1}$ ) at the initial time point (c) and at 6 h (d);  $668 \mu\text{M}$   $\text{CeCl}_3$  at the initial time point (e) and at 6 h (f). All the experimental conditions are pH 2.58,  $30 \pm 0.5^\circ\text{C}$  and 200rpm.
